# Supplementary material for: Polymorphism and expression of GLUD1 in relation to reproductive performance in Jining Grey goats
Source: Copernicus journal article supplement (doi:10.5194/aab-66-411-2023), 2023-12-07
Supplement: Supplementary file 1 [file aab-66-411-2023-supplement.zip]

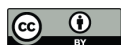

## *Supplement of*

# **Polymorphism and expression of *GLUD1* in relation to reproductive performance in Jining Grey goats**

**Wei Wang et al.**

*Correspondence to:* Jinyu Wang (jywang@yzu.edu.cn) and Mingxing Chu (mxchu@263.net)

- aab-66-411-2023-supplement-title-page.pdf
- Figure S1. Photos for different breeds.jpg

The copyright of individual parts of the supplement might differ from the article licence.
